# Supplementary material for: Lithium bis(oxalate)borate additive in the electrolyte to improve Li-rich layered oxide cathode materials
Source: Royal Society of Chemistry journal article supplement (doi:10.1039/d0qm00094a), 2020-01-01
Supplement: d0qm00094a1.pdf [file d0qm00094a1.pdf]

## Electronic Supplementary Information

### Lithium bis(oxalate)borate additive in electrolyte to improve Li-rich layered oxide cathode materials

Zi Xiao<sup>a</sup>, Jiuding Liu<sup>a</sup>, Guilan Fan<sup>a</sup>, Junxiang Liu<sup>a</sup>, Xinglong Gou<sup>c</sup>, Mingjian Yuan<sup>a,b,\*</sup>, Fangyi

Cheng<sup>a,b,\*</sup>

<sup>a</sup> Key Laboratory of of Advanced Energy Materials Chemistry (Ministry of Education), Engineering Research Center of High-efficiency Energy Storage (Ministry of Education), College of Chemistry, Nankai University, Tianjin 300071, China. E-mail: yuanmj@nankai.edu.cn, fycheng@nankai.edu.cn

<sup>b</sup> Renewable Energy Conversion and Storage Center, Nankai University, Tianjin 300071, China

<sup>c</sup> Chemical Synthesis and pollution Control key Laboratory of Sichuan Province, College of Chemical Engineering, China West Normal University, Nanchong 637000, China.

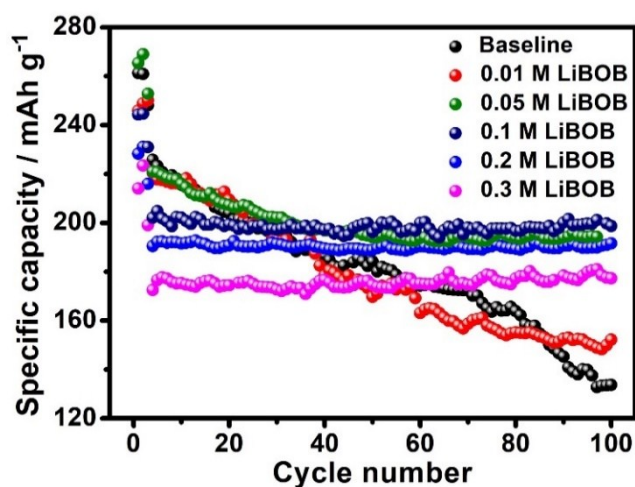

**Figure S1:** Cycling performance of LLO cells with various concentrations of LiBOB.

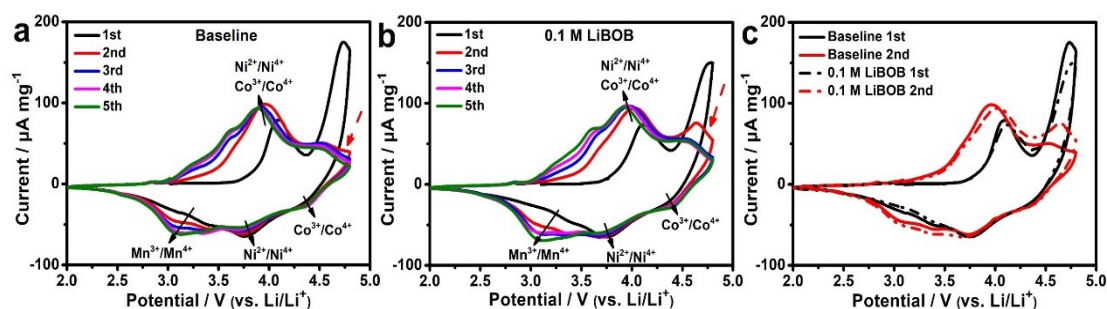

**Figure S2:** CV curves of LLO half cells (a) in baseline and (b) 0.1 M LiBOB electrolytes. (c) The comparison of initial two cycles.

As shown in Fig. S2c, the current of the peak at 4.5 V of anionic oxygen redox in the first cycle with 0.1 M LiBOB relatively decreased as compared with that in baseline counterpart and there is still an apparent oxygen redox peak during second cycle, indicating the inhibition impact of LiBOB on the activation of  $\text{Li}_2\text{MnO}_3$  phase.

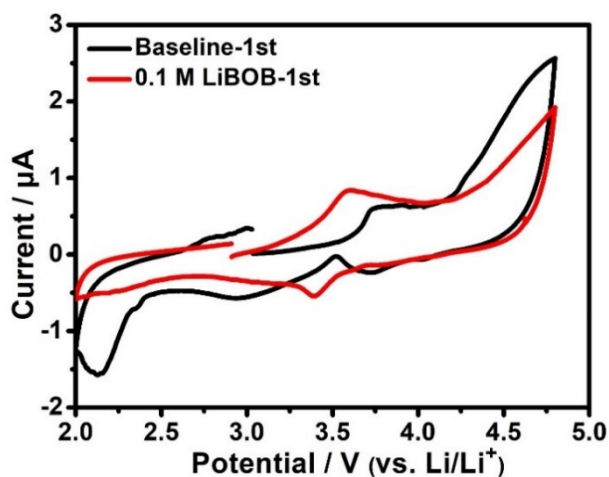

**Figure S3:** The CV curves of Li|Al cells in baseline and 0.1 M LiBOB electrolytes.

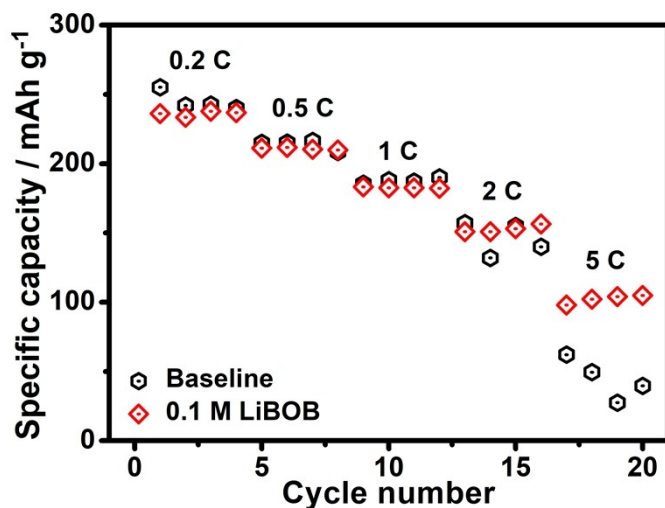

**Figure S4:** Rate performance of LLO in baseline and LiBOB-containing electrolytes.

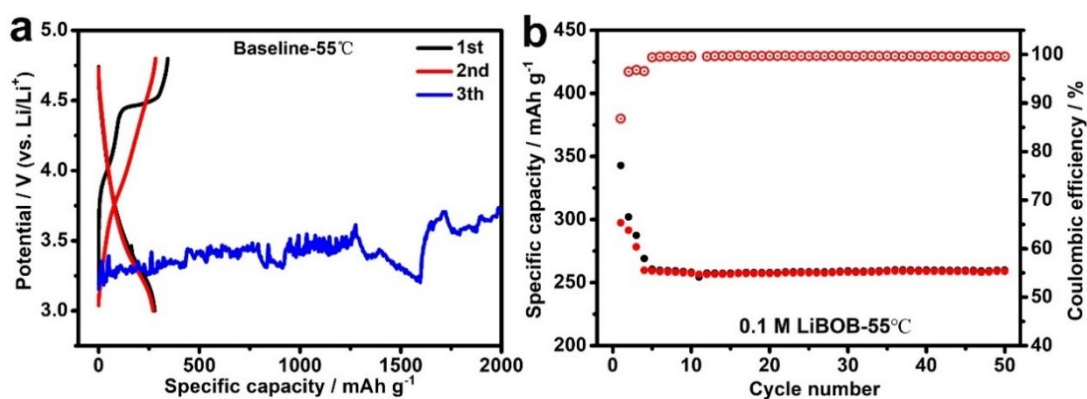

**Figure S5:** (a) The initial three-cycles charge/discharge profiles of battery with baseline electrolyte at 55°C. (b) The cycling performance of cell with 0.1 M LiBOB at 55°C.

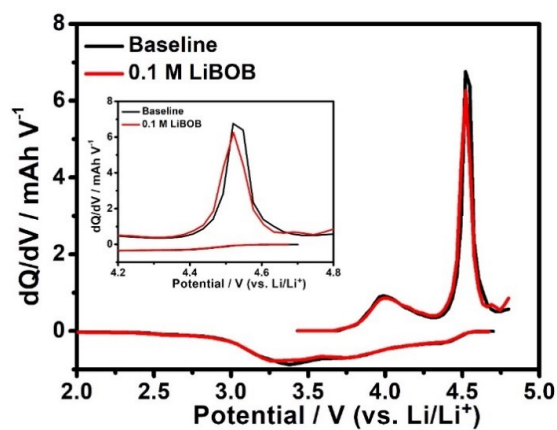

**Figure S6:** The dQ/dV profiles in baseline and LiBOB-containing electrolytes during the first cycle at 0.1C.

The differential capacity curves display that the peak at about 4.5 V shifts to a slightly lower voltage along with a weakened intensity in 0.1 M LiBOB electrolyte, revealing the preferential oxidation of LiBOB,<sup>1</sup> which is consistent with Fig. S3.

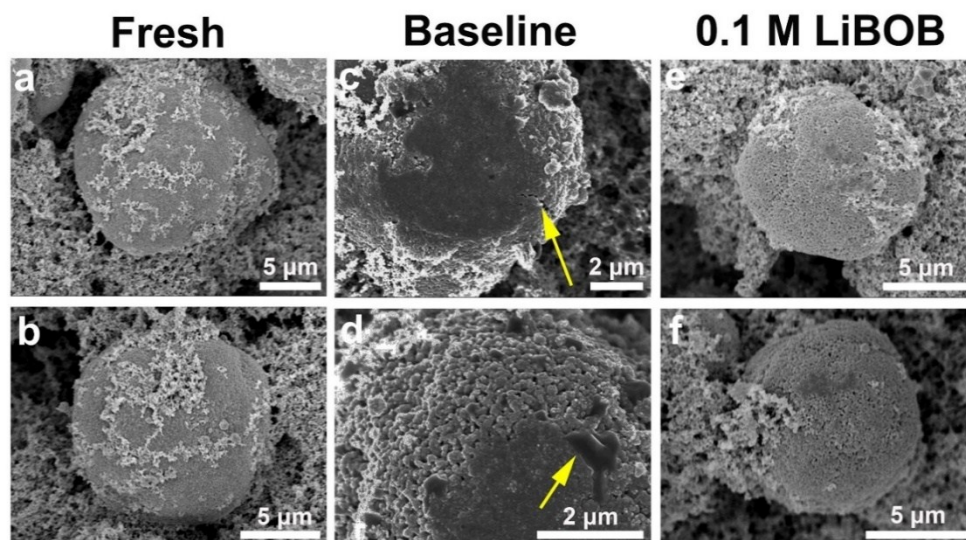

**Figure S7:** SEM micrographs of (a, b) the fresh LLO cathode and the cathode after cycling (c, d) in baseline and (e, f) 0.1 M LiBOB electrolytes.

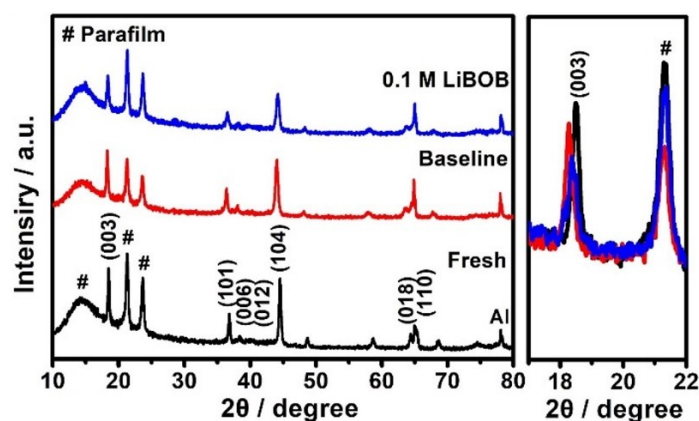

**Figure S8:** XRD patterns of fresh and cycled LLO cathodes with baseline and 0.1 M LiBOB electrolytes.

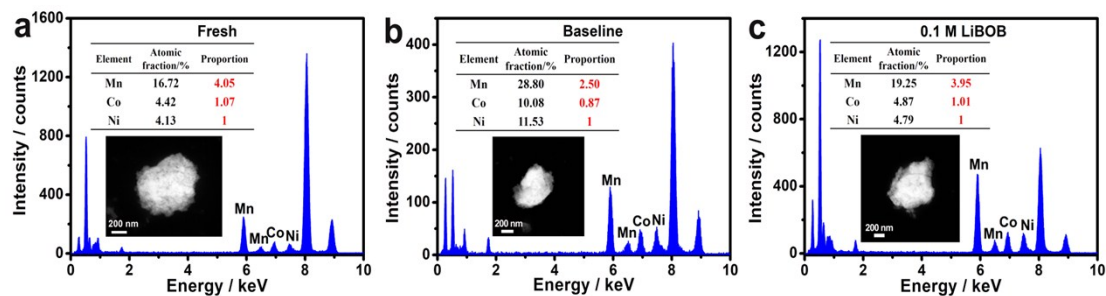

**Figure S9:** EDS spectra of (a) fresh LLO cathode and cycled cathodes (b) in baseline and (c) 0.1 M LiBOB electrolytes. Insets in (a-c) are the selected region for the EDS measurement and the corresponding proportion of Mn, Co and Ni elements.

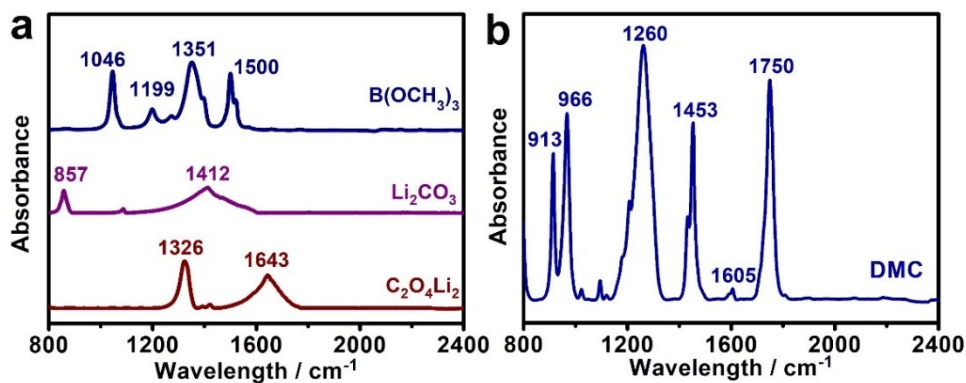

**Figure S10:** Individual FTIR spectra of (a)  $\text{Li}_2\text{CO}_3$ ,  $\text{C}_2\text{O}_4\text{Li}_2$ ,  $\text{B(OCH}_3)_3$  and (b) DMC.

**Table S1:** Calculated vibration frequencies and assignments of 1B-O structure according to DFT calculation.

| Calculated<br>$\nu$ ( $\text{cm}^{-1}$ ) | Observed<br>$\nu$ ( $\text{cm}^{-1}$ ) | Assignments                 |
|------------------------------------------|----------------------------------------|-----------------------------|
| 1869.3                                   | 1823                                   | C=O asymmetric stretching   |
| 1837.3                                   | 1778                                   | C=O symmetric stretching    |
| 1243.8                                   | 1226                                   | O-C-C asymmetric stretching |
| 941.0                                    | 987                                    | O-B-O asymmetric stretching |

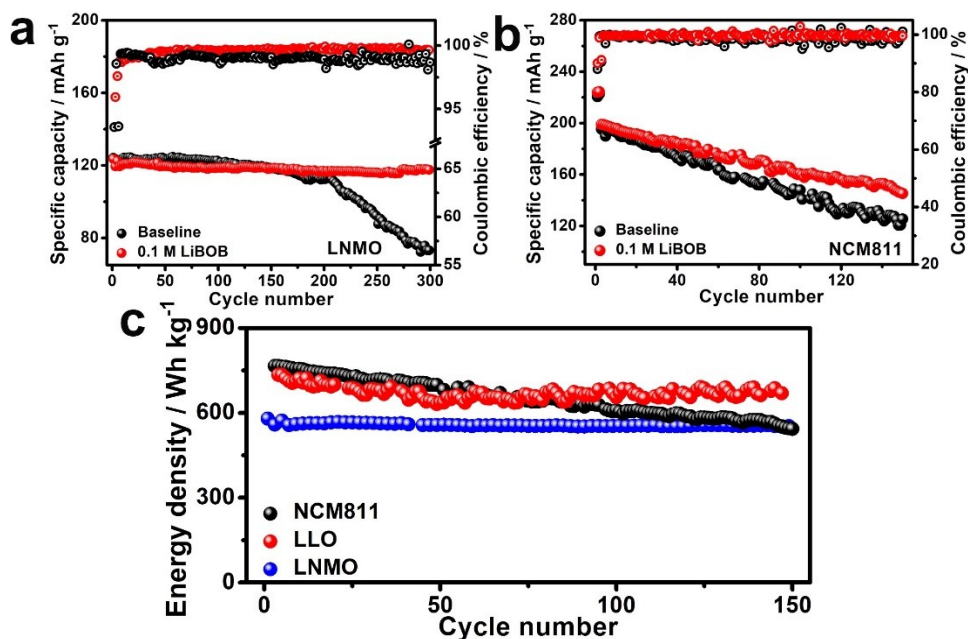

**Figure S11:** The cycling performances of (a) Li|LiNi<sub>1.5</sub>Mn<sub>0.5</sub>O<sub>4</sub> and (b) Li|LiNi<sub>0.8</sub>Co<sub>0.1</sub>Mn<sub>0.1</sub>O<sub>2</sub> half-cells at 1 C with different electrolytes. (c) The energy densities of Li|LLO, Li|NCM811 and Li|LNMO coin cells at 0.5 C in 150 cycles.

In addition to the LLO materials, the LiBOB additive also plays a noteworthy role in other high-voltage cathodes such as LiNi<sub>0.5</sub>Mn<sub>1.5</sub>O<sub>4</sub> and Ni-rich electrodes.<sup>2-6</sup> We measured the cycling performance of Li|LiNi<sub>0.5</sub>Mn<sub>1.5</sub>O<sub>4</sub> and Li|LiNi<sub>0.8</sub>Co<sub>0.1</sub>Mn<sub>0.1</sub>O<sub>2</sub> half-cells at 1 C in the voltage range of 3.0-4.9 V and 3.0-4.7 V, respectively (Fig. S11a, S11b). Obviously, moderate LiBOB could also extend the service life of LNMO and NCM811. Moreover, as shown in Fig. S11c, LLO cathode presents the highest and most stable energy density compared with Li|NCM811 and Li|LNMO cells in 0.1 M LiBOB electrolyte, further highlighting the positive effect of LiBOB additive in LLO cathode.



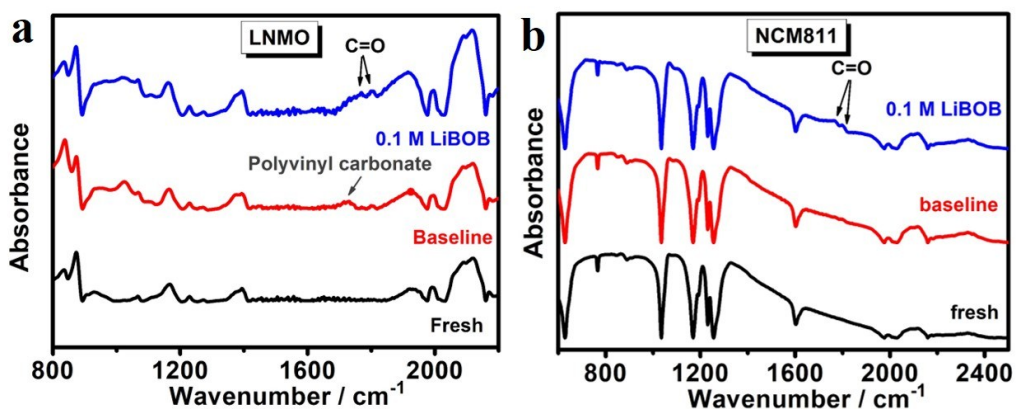

**Figure S12:** FTIR spectra of fresh and cycled (a) LNMO electrode at 3.0-4.9 V and (b) NCM811 electrode at 3.0-4.7 V.

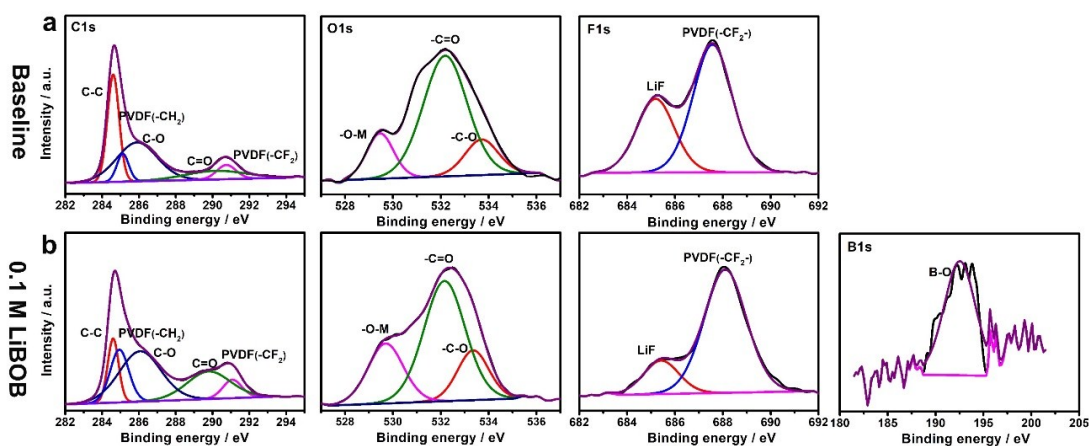

**Figure S13:** XPS characterization of  $\text{Li}_{1.2}\text{Mn}_{0.54}\text{Co}_{0.13}\text{Ni}_{0.13}\text{O}_2$  electrode after 100 cycles (a) in baseline and (b) 0.1 M LiBOB electrolytes.

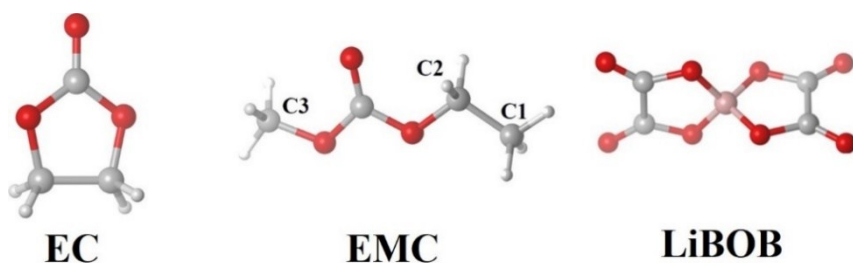

**Figure S14:** The Optimized structures of EC, EMC and BOB<sup>-</sup>.

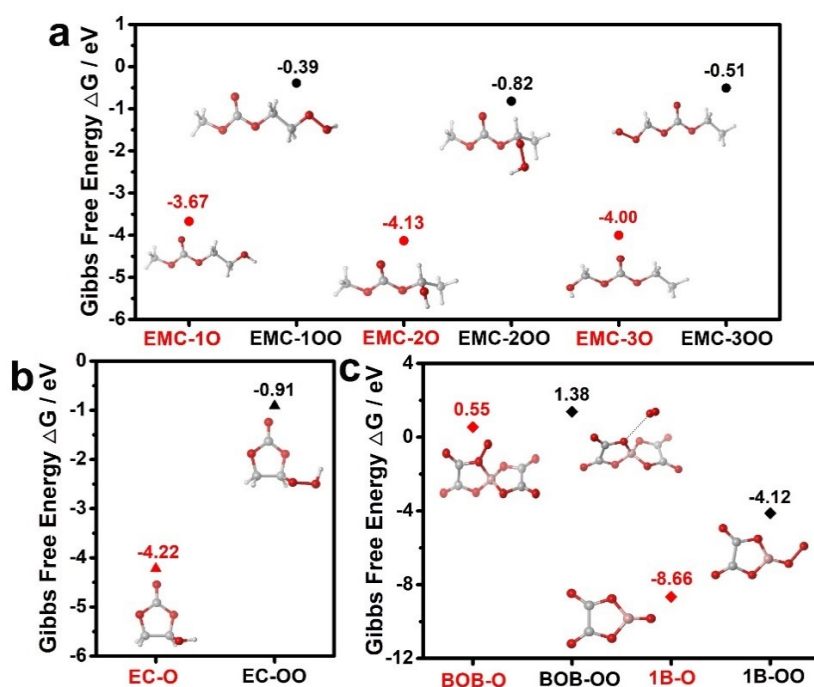

**Figure S15:** The Gibbs free energies of the active oxygen species ( $\text{O}_2^{\cdot-}/\text{O}^{\cdot-}$ ) with (a) EMC, (b) EC and (c) LiBOB, respectively.

Since EMC owns three distinct positions of carbon (defined as C1, C2 and C3, Fig. S14) and LiBOB has various decomposition modes, which complicate their style of connection with oxygen radicals ( $\text{O}_2^{\cdot-}/\text{O}^{\cdot-}$ ), the Gibbs free energy ( $\Delta G$ ) calculations were performed to obtain the optimal combinations of EC, EMC and LiBOB with oxygen. As displayed in Fig. S15a, when oxygen radicals combine with C2 in EMC, the lowest Gibbs free energy appears. Differently, there is only one position of carbon atom in EC, which bonds with the oxygen species (Fig. S15b). It can be seen in Fig. S15c that the partially decomposed structure of  $\text{BOB}^{\cdot-}$  tends to trap oxygen radicals in priority as compared with the unreacted  $\text{BOB}^{\cdot-}$ .

## References

1. W. Tu, P. Xia, X. Zheng, C. Ye, M. Xu and W. Li, Insight into the interaction between layered lithium-rich oxide and additive-containing electrolyte, *J. Power Sources*, 2017, **341**, 348-356.
2. K. Xu, Electrolytes and Interphases in Li-Ion Batteries and Beyond, *Chem. Rev.*, 2014, **114**, 11503-11618.



3. Y. Dong, B. T. Young, Y. Zhang, T. Yoon, D. R. Heskett, Y. Hu and B. L. Lucht, *ACS Appl. Mater. Interfaces*, 2017, **9**, 20467-20475.
4. M. Xu, L. Zhou, Y. Dong, Y. Chen, J. Demeaux, A. D. MacIntosh, A. Garsuch and B. Lucht, Effect of lithium borate additives on cathode film formation in  $\text{LiNi}_{0.5}\text{Mn}_{1.5}\text{O}_4/\text{Li}$  cells, *Energy Environ. Sci.*, 2016, **9**, 1308-1319.
5. J. Li, W. Li, Y. You and A. Manthiram, Extending the service life of high-Ni layered oxides by tuning the electrode–electrolyte interphase, *Adv. Energy Mater.*, 2018, **8**, 1801957.
6. W. Zhao, L. Zou, J. Zheng, H. Jia, J. Song, M. H. Engelhard, C. Wang, W. Xu, Y. Yang and J. G. Zhang, Simultaneous stabilization of  $\text{LiNi}_{0.76}\text{Mn}_{0.14}\text{Co}_{0.10}\text{O}_2$  cathode and lithium metal anode by lithium bis(oxalato)borate as additive, *ChemSusChem*, 2018, **11**, 2211-2220.
